# Supplementary material
Source: PubMed Central journal article supplement (PMC5987280)

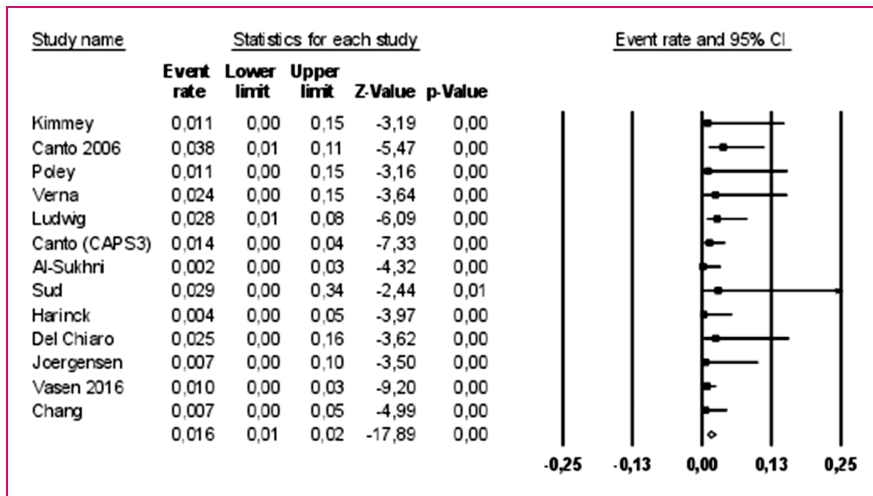

CI: confidence interval.

Supplement: UEG752182_online.pdf [file UEG752182_online.pdf]
